**Title:** Obesity blocks oligodendrocyte precursor cell differentiation and impedes repair after white matter stroke

**Abbreviated title:** Obesity blocks OPC differentiation

**Authors:** Guanxi Xiao<sup>1</sup>, Jasmine Burguet<sup>2</sup>, Riki Kawaguchi<sup>1,3</sup>, Leif A. Havton<sup>1,4</sup>, Jason D. Hinman<sup>1</sup>

**Affiliations:**

<sup>1</sup> Department of Neurology, David Geffen School of Medicine, University of California Los Angeles

<sup>2</sup> Institut Jean-Pierre Bourgin, INRA, AgroParisTech, CNRS, Université Paris-Saclay, 78000 Versailles, France

<sup>3</sup> Department of Psychiatry, Semel Institute for Neuroscience and Human Behavior, University of California Los Angeles

<sup>4</sup> Department of Neurobiology, David Geffen School of Medicine, University of California Los Angeles

**Corresponding author:**

Jason D. Hinman, M.D., Ph.D.  
David Geffen School of Medicine  
University of California Los Angeles  
Department of Neurology  
635 Charles E. Young Dr. South, Room 415  
Los Angeles, CA 90095  
Ph: 310-825-6761  
Email: [jhinman@mednet.ucla.edu](mailto:jhinman@mednet.ucla.edu)

**Pages:** 27

**Figures:** 7

**Tables:** 1

**Word Count:** 8223

**Conflict of Interest:** The authors declare no competing financial interests.

**Author Contributions:** G.X and J.D.H designed research; G.X., R.K., and J.D.H. performed gene expression analysis; J.B. performed spatial analysis; G.X. and L.A.H. performed electron microscopy and analysis; G.X. and J.D.H. wrote the paper.

**Acknowledgements:** This work was graciously supported by grants from the Larry L. Hillblom Foundation (TLLHF 2014-A-014), the American Heart Association Grant-in-Aid (16GRNT31080021). JDH receives support from the National Institute for Neurological Disorders and Stroke (K08 NS083740) and the United States Department of Veterans Affairs Greater Los Angeles Healthcare System. LAH receives support from the Dr. Miriam and Sheldon G. Adelson Medical Research Foundation.

## Abstract

Obesity is a growing public health problem that increases rates of white matter atrophy and increases the likelihood of ischemic lesions within white matter. However, the cellular and molecular mechanisms that regulate these changes are unknown. We hypothesized that obesity may alter oligodendrocytes and myelin priming white matter for worsening injury and repair responses after ischemia. C57Bl/6 mice fed a high fat diet (60% kcal from fat) show increased numbers of oligodendrocyte precursor cells (OPCs), decreased myelin thickness with elevated g-ratios, and shorter paranodal axonal segments, indicating accelerated myelin turnover. Fate mapping of OPCs in *PDGFR $\alpha$ -Cre<sup>ERT</sup>;Rpl22<sup>tm1.1P<sup>sam</sup></sup>* mice demonstrated that OPC differentiation rates are enhanced by obesity. Gene expression analyses using a novel oligodendrocyte staging assay demonstrated OPC differentiation is blocked by obesity in between the pre-myelinating and myelinating stage. Using a model of subcortical white matter stroke, the number of stroke-responsive OPCs in obese mice was increased after stroke. At early time points after ischemic white matter stroke, spatial mapping of stroke-responsive OPCs indicates that obesity leads to increased OPCs at the edge of ischemic white matter lesions. At later time points, obesity results in increased OPCs within the ischemic lesion while reducing the number of GST- $\pi$ -positive mature oligodendrocytes in the lesion core. These data indicate that obesity disrupts normal white matter biology by blocking oligodendrocyte differentiation, leads to an exaggerated response of OPCs to white matter ischemia, and limits remyelination after stroke.

## **Significance Statement**

Obesity is a growing public health crisis that specifically increases the development of white matter lesions and silent brain infarcts. This relationship implies a direct cellular effect on white matter yet direct evidence is limited. We modeled diet-induced obesity in mice and studied the effect on oligodendrocyte biology and the response to focal white matter stroke. Adult-onset obesity results in thinner myelin, compromised axonal microdomain structure, and blocks the differentiation of OPCs, leaving the white matter with increased numbers of OPCs. After focal white matter stroke in obese mice, the early OPC response to stroke is exaggerated while late reparative OPC differentiation is blocked. These results suggest that obesity specifically blocks OPC differentiation with consequence on brain repair after stroke.



## Introduction

Obesity is an emerging public health crisis with rates of adult obesity in the US approaching 40% (Ogden et al., 2015). Among the various ill-health effects of obesity, its role in damaging brain white matter is clear. Obesity increases the risk of developing silent lacunar infarcts (Bokura et al., 2008; Park et al., 2008) six-fold and increases the detection of white matter hyperintensities on MRI (Park et al., 2008). Increased body mass index is also associated with white matter atrophy (Karlsson et al., 2013) and reduced white matter tract integrity (Stanek et al., 2011; Bettcher et al., 2013; Xu et al., 2013; Kullmann et al., 2016). These observed declines in fractional anisotropy (FA) using diffusion tensor imaging suggest that obesity specifically disrupts myelination and axonal integrity. These obesity-related white matter changes are increasingly linked with cognitive impairment (Debette et al., 2011) and functional disability (Inzitari et al., 2009).

Despite the increasing rates of obesity and its established relationship with white matter pathologies in humans, the effect of obesity on white matter biology remains largely unknown. In leptin-deficient genetically obese mice (*ob/ob*), lower amounts of myelin and the fatty acid composition of myelin are altered (Sena et al., 1985). At early embryonic stages, leptin-deficiency contributes to an increased number of oligodendrocyte precursor cells (OPCs) (Udagawa et al., 2006), while leptin-treated *ob/ob* mice showed an increase in myelination (Gouw et al., 2008) suggesting that leptin may partially regulate oligodendrocyte differentiation. Whether these findings in leptin-deficient mice relate to the more widespread forms and models of diet-induced obesity is unclear.

Increased in frequency by obesity, focal ischemic white matter strokes are common (Benjamin et al., 2018) and progressive (Gouw et al., 2008). The pathology of these lesions revolves centrally around the oligodendrocyte lineage. Mature oligodendrocytes are exquisitely sensitive to ischemia (Oka et al., 1993; Pantoni et al., 1996; McDonald et al., 1998b; McDonald et al., 1998a), undergo rapid (Sozmen et al., 2009) and progressive (Hinman and Carmichael, 2014) cell death after focal white matter lesions. OPCs respond robustly to ischemic white matter lesions (Sozmen et al., 2016). Limited OPC differentiation and remyelination after white matter stroke tempers functional recovery, particularly in aged animals (Rosenzweig and Carmichael, 2013). Understanding the role obesity plays in normal white matter biology and its role in

altering white matter injury and repair seems a pre-requisite to designing therapeutic strategies for this common form of stroke.

To examine the role obesity plays in altering white matter and the response to a focal white matter stroke, we used cellular, ultrastructural, and gene expression approaches in combination with diet-induced obesity and a mouse model of focal white matter stroke. We show that obesity increases the resting number of OPCs in white matter yet also blocks their differentiation specifically at the transition point from pre-myelinating to mature myelinating oligodendrocytes leading to thinner myelin sheaths and axonal microdomain changes. In turn, these obesity-induced effects on the oligodendrocyte lineage result in an exaggerated response to white matter stroke creating a larger lesion burden, impaired OPC differentiation in response to stroke, and further limit remyelination after stroke.

## Material & Methods

### *Mice*

All animal studies presented here were approved by the UCLA Animal Research Committee, accredited by the AAALAC. Mice were housed under UCLA regulation with a 12 hour dark-light cycle. All mice used in the study were male. Wild-type C57Bl/6 mice fed ad lib on 60%kCal from fat chow (HFD) (Strain #380050) or 10%kCal from fat chow (CFD) (Strain #380056) were purchased directly from Jackson Labs at 17 weeks of age and allowed to acclimate for 2 weeks prior to experimental use. The PDGFR $\alpha$ - CreERT<sup>2</sup>/Rpl22-HA transgenic strain was generated by crossing PDGFR $\alpha$ - CreERT<sup>2</sup> mice (Jackson Labs Strain #018280 - B6N.Cg-Tg(Pdgfra-cre/ERT)467Dbe/J) with Rpl22-fl-Rpl22-HA (Jackson Labs Strain #011029 - B6N.129-Rpl22<sup>tm1.1Psam</sup>/J). Diet-induced obesity was induced in transgenic mice by ad lib feeding with 60%kCal from fat chow (HFD) or 10%kCal from fat chow (CFD) (Research Diets, Inc.). Weights (g) were measured weekly.

### *Fate mapping*

Tamoxifen (Sigma) were dissolved in corn oil to make 20mg/ml stock solution. For early stage OPC fate mapping, tamoxifen was injected i.p. to PDGFR $\alpha$ -CreERT<sup>2</sup>/Rpl22-HA ( $n = 9$ ) mice (50mg/kg) daily for 4 consecutive days beginning at 8 weeks of age. Mice were euthanized and brains were analyzed at 20 weeks of age. For late stage OPC fate mapping, tamoxifen was injected i.p. to PDGFR $\alpha$ -CreERT<sup>2</sup>/Rpl22-HA ( $n = 8$ ) mice (50mg/kg) daily for 4 consecutive day at 20 weeks of age. Mice were euthanized and brains analyzed at 28 days after the last injection.

### *Electron microscopy*

Wild-type C57Bl/6 mice ( $n = 6$ /grp) on CFD or HFD were transcardially perfused with a 2% glutaraldehyde solution, post-fixed for 24 hrs, hemisected in the sagittal plane and 2 mm cubes including the corpus callosum were dissected and embedded in plastic resin for ultrastructural analysis as previously described (Sozmen et al., 2016). One micron, plastic embedded toluidine blue stained sections were used to select transcallosal fibers underneath sensorimotor cortex by light microscopy. Three electron micrographs were obtained at a primary magnification of 7200X using a JEOL 100 CX transmission electron microscope and a representative electron

micrograph of high technical quality from each animal was used for quantitation of fiber diameter, axon diameter, myelin thickness, and g-ratio.

### *Immunofluorescence*

Animals were euthanized with a lethal dose of isoflurane, transcardially perfused with PBS followed by 4% paraformaldehyde in 0.1 M sodium phosphate buffer, brains removed, post-fixed for 24 hrs and cryoprotected for 48 hrs in 30% sucrose in PBS. Forty micron coronal cryosections and immunostaining was performed essentially as described (Hinman et al., 2013). The following primary antibodies were used: mouse anti-NF200 (1:200, Sigma), rabbit anti-MBP (1:500, Calbiochem), goat anti-PDGFR $\alpha$  (1:500; Neuromics), mouse anti-HA (1:1000, Biolegend), rabbit anti-AnkG (1:1000, Dako), rabbit anti-Nav1.6 (1:250), rabbit-Gst- $\pi$  (1:1000, Millipore), in PBS containing 5% goat or donkey serum and 0.3% Triton-X 100 (Sigma) overnight at 4°C. Secondary antibody labeling was performed using donkey anti-mouse, donkey anti-rabbit, or donkey anti-goat Fab<sub>2</sub>-Alexa conjugated antibodies (Jackson ImmunoResearch, Inc.).

### *Microscopy*

All microscopic images were obtained using a Nikon C2 confocal microscope. Optical slices were analyzed in Imaris with automated “Add Spots” function to generate cell counts and x,y,z positional coordinates. OPCs stroke responsive areas were generated by Imaris with “Add Surface” function. Measurements of stroke areas were generated using Fiji (Schindelin et al., 2012). Representative images were selected for presentation.

### *Gene expression analysis*

Using established oligodendrocyte stage marker genes (Zhang et al., 2014), we designed a custom Nanostring® gene expression array using gene-specific probes for each the 40 genes marking each oligodendrocyte stage (OPC, pre-myelinating oligodendrocyte (PMO), and myelinating oligodendrocyte (MO)). C57Bl/6 mice (n=4/group) were maintained on 12 weeks of CFD or HFD. At 20 weeks of age, the corpus callosum was isolated, homogenized, and RNA using the Nucleospin miRNA kit (Clontech) to collect both large and small RNA species. RNA was quantitated and 100 ng of RNA from each animal was provided as input for the direct RNA

detection assay. Manufacturer protocol was followed and the results were analyzed using nCounter® software. Results were normalized and differentially expressed genes were compared individually between groups using a Student's t-test ( $p < 0.05$ ). The number of DEGs ( $p < 0.05$ ) per stage was determined. log<sub>2</sub>FC values were calculated as a function of averaged housekeeping gene expression levels (*actb*, *b2m*, *gapdh*, *pgk1*, *rpl19*). To generate an oligodendrocyte stage cell type index, raw gene expression values were combined with FPKM values from Zhang et al. (2014) and normalized by rank. Hierarchical clustering analysis was performed using hclust and tSNE plots (perplexity=3, max iteration = 5000) generated using standard algorithms. The resulting classification and 2-dimensional representation were highly reproducible.

### *White matter stroke*

Subcortical white matter ischemic injury was induced as previously described (Hinman et al., 2013; Nunez et al., 2016). Animals ( $n = 4/\text{grp}$ ) were sacrificed at 7 and 28 days post-stroke and analyzed for tissue outcomes.

### *Spatial analysis*

Analysis of the spatial distribution of stroke-responsive OPCs was performed as follows. The boundary of increased PDGFR- $\alpha$ -+ cells and the loss of GST- $\pi$ -+ cells was identified in each of three sections per animal ( $n=3$  animals/group). Using Imaris software, the x,y,z position of each PDGFR- $\alpha$ -+ cell relative to the user defined center point ( $x=0$ ,  $y=0$ ,  $z=0$ ) of the elliptical stroke region was determined. Because the z-axis was limited (10  $\mu\text{m}$ ), a two-dimensional grid analysis was performed using a 2D modification of the previously reported 3D spatial density estimator (Burguet et al., 2011) using a smoothing parameter of  $k=8$ . The local cell density in each position within the overlaid grid is compared statistically as previously described (Burguet and Andrey, 2014). Therefore, a  $p$ -value map is generated for each position in the grid and thresholded ( $p < 0.05$ ) to reveal regions with significant density differences.

### *Experimental Design and Statistical Analysis*

The number of animals used in each experiment is listed in the Results section. Oligodendrocyte population cell counts as a fraction of total cells were determined by averaging counts from 5 fields of view throughout the corpus callosum across a minimum of three sections 240  $\mu\text{m}$  apart.

Per animal averages were generated and significance between groups determined using an unpaired Welch's t-test ( $\alpha=0.05$ ). For OPC fate mapping, similarly obtained per animal averages were analyzed using Holm-Sidak test to adjust  $p$ -values for multiple t-tests. Analysis of nodal/paranodal complexes was performed using an unpaired Welch's t-test ( $\alpha=0.05$ ), while paranodal length varies based on axonal diameter and were therefore analyzed using a distribution analysis and Chi-square statistic ( $df=12$ ). Measurements of white matter ultrastructural features were averaged across animals and each feature was compared separately using Mann-Whitney U test between groups ( $\alpha=0.05$ ). Gene expression differences were determined at the individual gene level using unpaired Welch's t-test ( $\alpha=0.05$ ). Determination of stroke lesion area was performed by sampling lesion area ( $n=3-5$  40  $\mu\text{m}$  sections) across groups ( $n=4/\text{grp}$ ) and using the sampled distribution to create bootstrapped area distribution ( $n=25$ ) representing a full area sampling of the approximate 1 mm lesion created by the stroke model. This area distribution was averaged across animals in each group and compared using a Mann-Whitney U test between groups ( $\alpha=0.05$ ). Spatial analysis of stroke-responsive OPCs were determined as detailed above. Cell counts at 28d post-stroke were determined across three sections 240  $\mu\text{m}$  apart significance with lesion core and edge analyses determined using a two-way ANOVA ( $\alpha=0.05$ ) with post-hoc Holm-Sidak test to adjust  $p$ -values for multiple t-tests. Statistical analysis was performed using GraphPad Prism 7 software. Data are shown as mean  $\pm$  SEM.

## Results

### *Obesity increases the oligodendrocyte precursor cell population in white matter*

To induce obesity, mice were fed with 60% kCal from fat diet (HFD) beginning at 8 weeks of age and continuing for 12 weeks (Surwit et al., 1988; Podrini et al., 2013). Mice fed with HFD develop severe obesity with an average 84.0% weight gain compared to 21.7% in control diet fed mice (10% kCal from fat; CFD) (Fig.1a). This weight gain is associated elevations of total cholesterol (110.7 vs. 187.3;  $p=0.023$ ), LDL (37.0 vs. 99.7;  $p=0.043$ ), glucose (162.0 vs. 373.3) and HgbA1c (5.6 vs. 6.6), largely consistent with the clinical definition of metabolic syndrome (Benjamin et al., 2018). To determine the effects of obesity on oligodendrocytes, we immunolabeled brain sections with PDGFR $\alpha$  to label OPCs and GST- $\pi$  to label mature oligodendrocytes (Fig. 1c-f). We sampled oligodendrocyte cell populations throughout the frontal subcortical white matter (Fig. 1b). The percentage of GST- $\pi$ <sup>+</sup> cells were nearly identical in CFD (76.4 $\pm$ 1.4%) and HFD (75.8 $\pm$ 0.6%) mice (Fig.1g). However, the percentage of PDGFR $\alpha$ <sup>+</sup> cells was significantly increased in HFD (5.66 $\pm$ 0.22%) compared to CFD (5.01 $\pm$ 0.13%;  $p=0.014$ ; Fig.1h). Importantly, PDGFR $\alpha$ <sup>+</sup> cell counts in CFD animals were remarkably similar to previous reports of the abundance of the OPC population in white matter (Pringle and Richardson, 1993; Chang et al., 2000; Dawson et al., 2003; Bergles and Richardson, 2015). These data indicate that obesity modestly elevates the resting proportion of OPCs in white matter.

### *Obesity compromises axonal integrity in white matter*

Because obesity increased the OPC population in white matter, we reasoned that myelin turnover might be affected leading to changes at nodal and paranodal structures within axons. We examined axonal microdomain structure in callosal axons using immunolabeling for Nav1.6 to label the node and Caspr to label the paranodal segment (Fig. 2a-b). In mice on CFD, the nodal and paranodal structures were normal (Fig. 2a inset) while in mice on HFD, paranodal segments appeared shorter and the number of intact nodal and paranodal complexes were reduced (Fig. 2b) In HFD mice, we found a decrease in intact nodal (green)/paranodal (red) complexes (defined as node with two adjacent paranodes) per field (Fig. 2c). Measurement of paranodal length was performed and the frequency of paranodes within each 0.2  $\mu$ m bin from 0.6-3.0  $\mu$ m in length were determined. In mice on HFD, we found a reduction in average

paranodal length from  $1.70 \pm 0.03 \mu\text{m}$  in CFD ( $n=256$  paranodes) compared to  $1.29 \pm 0.02 \mu\text{m}$  ( $n=337$  paranodes;  $p < 0.0001$ ) which was associated with a significant left shift of the distribution of paranodal lengths ( $\chi^2 = 1 \times 10^{-137}$ ) (Fig. 2d), indicating shorter paranodal segments consistent with incomplete myelination.

### *Obesity reduces myelin thickness*

To firmly establish the effects of obesity on myelin and white matter, we prepared sagittal sections including callosal fibers for ultrastructural analysis by EM. In 20-week old mice on CFD ( $n = 6$ ), myelin ultrastructure was quite normal with intact axonal fibers, myelin thickness, and a g-ratio of 0.8 (Fig. 3a). In 20-week old mice on HFD ( $n = 6$ ), we observed an increased frequency of moderate to larger size axonal fibers with thinner than expected myelin sheaths (Fig. 3b). The total number of axonal fibers measured was not significantly different between CFD ( $135.8 \pm 10.48$ ) vs. HFD ( $107.2 \pm 14.88$ ;  $p=0.18$ ). Neither the average fiber diameter ( $0.76 \pm 0.07 \mu\text{m}$  vs.  $0.79 \pm 0.06 \mu\text{m}$ ;  $p=0.81$ ) nor axonal diameter ( $0.62 \pm 0.06 \mu\text{m}$  vs.  $0.69 \pm 0.05 \mu\text{m}$ ;  $p=0.48$ ) were significantly different between mice on CFD vs. HFD. Average myelin sheath thickness was significantly reduced in mice on HFD (Fig. 3c;  $0.070 \pm 0.005 \mu\text{m}$  vs.  $0.047 \pm 0.004 \mu\text{m}$ ;  $p=0.0087$ ) and the average g-ratio in animals on HFD was consequently increased compared to those on CFD (Fig. 3d;  $0.8 \pm 0.011$  vs.  $0.88 \pm 0.006$ ;  $p=0.002$ ). These results indicate that obesity accelerates myelin and oligodendrocyte turnover within white matter structures leading to thinner myelin.

### *Obesity accelerates oligodendrocyte precursor cell differentiation turnover*

The increased proportion of OPC and compromised integrity of myelin and white matter resulting from obesity suggests a failure of OPC differentiation into myelin-producing mature oligodendrocytes. *However, it is unclear how OPCs responses during the development of obesity and after obesity is present.* To answer this question, we performed fate mapping at two different points to analyze OPC differentiation using a novel  $PDGFR\alpha\text{-Cre}^{ERT};Rpl22^{tm1.1Psam}$  transgenic mouse strain we created by crossing the  $PDGFR\alpha\text{-Cre}^{ERT}$  strain with the  $Rpl22^{tm1.1Psam}\text{-HA}$  tagged ribosome reporter mouse (Fig. 4a). To confirm phenotypic labeling of OPCs, mice ( $n=2$ ) were injected with tamoxifen and analyzed 48 hours after the injection. HA+ reporter cells were clearly co-labeled with PDGFR $\alpha$ , indicating tamoxifen administration clearly labels OPCs (Fig.



4b). We performed OPC fate mapping both before and after the onset of obesity. First, we analyzed the response of OPCs after obesity is developed. Tamoxifen was injected at 20 weeks in CFD ( $n=4$ ) and HFD ( $n=4$ ) mice ( $31.3\pm 1.5\text{g}$  vs.  $45.5\pm 3.8\text{g}$ ;  $p=0.014$ ). The numbers of PDGFR $\alpha$ + / HA+ ( $6.5\pm 0.7\%$ ) and HA+ ( $26.7\pm 6.5\%$ ) cells were not significantly changed in HFD white matter compared to CFD ( $7.1\pm 0.8\%$ ;  $30.2\pm 1.8\%$  respectively;  $p=0.70$ ) (data not shown). However, administration of tamoxifen prior to the onset of obesity allowed us to track the rate of OPC differentiation. Early fate mapping of OPCs labeled at 8 weeks of age concurrent with starting the HFD, demonstrated a significantly increased number of HA+ cells in HFD white matter ( $68.8\pm 1.60$ ,  $n=4$ ) compared to CFD ( $54.5\pm 2.98$ ;  $n=4$ ;  $p=0.011$ ), while the number of PDGFR $\alpha$ + / HA+ cells was not significantly different ( $13.1\pm 2.78$  vs.  $16.1\pm 3.11$ ;  $p=0.47$ ) (Fig. 4c-e). Final weights of mice in the early fate mapping groups were ( $27.8\pm 1.4\text{g}$  vs.  $49.2\pm 0.8\text{g}$ ;  $p=9.9\text{e}^{-6}$ ). These data indicate that the rate of OPC differentiation is accelerated during obesity development. In the absence of robust *in vivo* markers for post-differentiated but not completely mature myelinating oligodendrocytes, we turned to a gene expression approach to better characterize precisely when oligodendrocyte differentiation might be impaired by obesity.

#### *Obesity blocks myelinating oligodendrocyte gene expression*

Together with our previous data of thinner myelin and shorter paranodal segments despite increased OPC differentiation, we reasoned that OPC differentiation was blocked by obesity. To determine where in oligodendrocyte differentiation this block occurs, we developed a gene expression assay on the Nanostring® platform using a probe set based on established markers of each stage of oligodendrocyte differentiation (OPC, pre-myelinating oligodendrocyte (PMO), and myelinating oligodendrocyte (MO) defined by cell type specific genes with FPKM > 20 (Zhang et al., 2014). The details for each probe set are available in the supplemental data file (Extended data Fig.5-1). All 120 genes were detectable using the assay and the expression of housekeeping genes was not significantly different between CFD and HFD. Differentially expressed genes ( $p<0.05$ ) were classified as up- or down- regulated relative to mice on CFD. The number of differentially expressed genes per oligodendrocyte stage was determined and is shown in Figure 5. Among the significantly up-regulated genes (average  $p$ -value = 0.0226), 12/40 (30%) were OPC stage genes, 8/40 (20%) were PMO stage genes, and 1/40 (2.5%) were MO stage genes (Fig. 5a). Significantly more OPC genes were differentially expressed (Fisher Exact

test;  $p=0.0108$ ). The average log-fold change ( $\log_2FC$ ) of the up-regulated genes were  $0.35\pm 0.17$  (OPC),  $0.23\pm 0.09$  (PMO) and  $0.21$  (MO) (Fig. 5b). Among the significantly down-regulated genes (average  $p$ -value =  $0.017$ ), all were MO stage genes  $18/40$  (45%) (Fig. 5c). The average log-fold change ( $\log_2FC$ ) of the down-regulated MO genes were  $-0.26\pm 0.10$  (Fig. 5d). To evaluate the global gene expression profile of white matter from mice on CFD vs. HFD, we combined our complete gene expression data set with RPKM values for the marker genes of each oligodendrocyte stage from Zhang et al. (2014). Using tSNE, the similarity of CFD (red) and HFD (blue) white matter samples were compared to OPC, PMO, and MO (Fig. 5e). As expected, tSNE and hierarchical clustering (Fig. 5f) demonstrates that PMO (yellow) and MO (gray) gene expression profiles are quite similar, while OPCs (green) represent a distinct precursor cell. CFD white matter samples cluster together as they represent a mix of all three oligodendrocyte cell types while HFD white matter samples cluster with the OPC population and away from the PMO and MO stages. Gene ontology analysis of the significantly different down-regulated genes indicates genetic programs in CNS and oligodendrocyte development, cytoskeletal organization, and myelination (arylsulfatase activity, GTP-Rho binding) are impacted by obesity. Gene ontology of up-regulated genes indicates genetic programs in anaerobic energy metabolism, production of extracellular matrix components, and signaling through  $PDGFR\alpha$  are increased by obesity (Table 1). Gene ontology analysis using equal numbers of randomly selected genes from the probe set revealed no overlapping terms for either up- or down-regulated genes. Overall, these findings indicate that obesity blocks OPC differentiation at the transition between PMO and MO cell types accounting for the changes observed by light and electron microscopy.

### *Obesity-induced OPC differentiation block exacerbates early and impairs late responses to white matter stroke*

Focal white matter lesions are characterized by dense loss of axons and oligodendrocytes, a robust inflammatory and astroglial response (Nunez et al 2016), with stroke-responsive OPCs invading the lesion and playing a key role in repair and remyelination (Sozmen et al. 2016). Because we identified an obesity-induced OPC differentiation block, we reasoned that injury response and repair after white matter stroke were likely to be impaired by obesity. To test this hypothesis, we induced a focal white matter stroke and analyzed the acute response at 7d after stroke (Fig. 6) as well as the status of lesional repair at 28d after stroke (Fig. 7), when stroke-

responsive OPCs are capable of limited differentiation and remyelination (Sozmen et al. 2016). At 7d after induction, focal white matter strokes can be identified by a dense loss of neurofilament and myelin basic protein staining (Fig. 6a). In animals on both CFD and HFD, labeling for surviving GST- $\pi$ <sup>+</sup> mature oligodendrocytes and stroke-responsive PDGFR $\alpha$ <sup>+</sup> OPCs reveals a well-demarcated core lesion with little to no GST- $\pi$ <sup>+</sup> mature oligodendrocytes and a corresponding PDGFR $\alpha$ <sup>+</sup> OPC rich area (Figs. 6b-c), though the average size of the stroke-responsive OPC area was larger in HFD animals (Fig. 6d;  $180935 \pm 9459 \mu\text{m}^2$  vs.  $235742 \pm 13371 \mu\text{m}^2$ ;  $p=0.002$ ) consistent with an increased number of stroke-responsive OPCs (Fig. 6e;  $137.3 \pm 21.17$  vs.  $247.7 \pm 14.5$ ;  $p=0.013$ ). The spatial localization of stroke-responsive OPCs were recorded in  $x,y,z$  coordinates relative to the center point of the stroke lesion (Fig. 6f). Nearest neighbor spatial analysis was used to compare stroke-responsive OPC distributions between animals on CFD and HFD (Fig. 6g). In lesion cores, the distribution of stroke-responsive OPCs were nearly identical between CFD (blue) and HFD (pink) (unshaded area). In contrast, at the lesion periphery, stroke-responsive OPCs were markedly more frequent in animals on HFD (pink shaded area) indicating an exaggerated early response to stroke in obese mice with the main effect on peri-infarct white matter.

To determine how this exaggerated early response in obesity impacts repair after stroke, we analyzed white matter stroke lesions 28d after stroke. At 28d after stroke, white matter stroke lesions are less well-demarcated by GST- $\pi$  and PDGFR $\alpha$  labeling (Fig. 7a). Therefore, we compared OPC and oligodendrocyte cell counts in three regions of interest across white matter in a central core lesion (middle box) and two lateral edge regions (left and right boxes) that correspond spatially with the area identified at 7d. This analysis revealed a significant change in oligodendrocyte cell populations 28d after stroke ( $p=0.0006$ , two-way ANOVA,  $F=9.854$ ). Within the lesion core, a significantly higher number of PDGFR $\alpha$ <sup>+</sup> OPCs were retained in animals on HFD compared to CFD (Fig. 7b-d;  $9.67 \pm 0.84$  vs.  $17.45 \pm 1.40$ ;  $p=0.034$ ;  $n=3/\text{grp}$ ). More OPCs were also detected in HFD animals at lesion edges ( $8.99 \pm 0.83$  vs.  $14.67 \pm 2.84$ ;  $p=0.16$ ). The morphologies of these cells were different from the typical bipolar OPCs morphology. Residual stroke-responsive OPCs in HFD animals adopted a more fibroblast morphology (Fig. 7c). Despite an increased frequency of PDGFR $\alpha$ <sup>+</sup> OPCs at the lesion periphery at 7d after stroke, GST- $\pi$ <sup>+</sup> mature oligodendrocytes were equal at the edge of stroke (Fig. 7e-f, 7i;  $15.00 \pm 1.42$  vs.  $15.50 \pm 2.50$ ;  $p=0.99$ ). Within the lesion core, a significantly lower number of

GST- $\pi$ <sup>+</sup> mature oligodendrocytes were noted in animals on HFD (Fig.7g-i;  $17.98 \pm 1.25$  vs.  $7.44 \pm 2.39$ ;  $p=0.004$ ). These results indicate that the obesity-induced OPC differentiation block within white matter exaggerates the early response to stroke and subsequently limits OPC differentiation after stroke.

## **Discussion**

Obesity is linked to changes in brain white matter that rely on measures of structural integrity such as fractional anisotropy (Alfaro et al., 2018). The cellular consequences of obesity on white matter are not clear. In this study, after 12 weeks of diet-induced obesity, we found that cells of the oligodendrocyte lineage are specifically impaired. Adult onset obesity increases the resting number of OPCs within callosal white matter while accelerating OPC differentiation in an incomplete way. Despite increased rates of OPC differentiation, mice with adult onset diet-induced obesity have thinner myelin sheaths, increased g-ratios, shorter paranodal segments, and axonal microdomain clustering failures. Using gene expression analyses, adult onset obesity appears to blocks OPC differentiation at or during the transition between pre-myelinating and myelinating oligodendrocyte stages, consistent with the ultrastructural changes observed by EM. In this obesity-primed state, white matter ischemic lesions produce an exaggerated OPC response leading to a measurable 30.1% increase in peri-infarct white matter in the early phase after stroke. During the remyelination and repair phase after white matter stroke (Sozmen et al., 2016), a persistent obesity-induced OPC differentiation block reduces OPC differentiation within the core of the ischemic lesion. These findings indicate that adult onset diet-induced obesity exerts a specific effect on white matter cellular biology keeping OPCs in a progenitor state yet paradoxically impairs tissue recovery after stroke by blocking oligodendrocyte differentiation and remyelination.

### **The structural integrity of white matter is compromised by obesity**

Observed reductions in fractional anisotropy seen in human imaging studies from subjects with obesity support a hypothesis of increased lateral water diffusivity through white matter tracts (Kullmann et al., 2016). The thinner myelin sheaths and resulting reduced axonal structural integrity in HFD mice can explain these findings. The approximate relationship between FA and the MR-estimated g-ratio is known and thought to be closely related

approaching equivalence (Mohammadi et al., 2015). In the corpus callosum of obese subjects, FA declines by 9.6% (Karlsson et al., 2013), while here we observed an 8.75% increase in the g-ratio in callosal fibers, indicating that the approximate effect of HFD in mice on myelin relates in effect size to the change in FA seen in obese human subjects. Because we did not observe significant differences in fiber diameter, axonal diameter or axonal number by EM, the structural integrity of axons appears not be dramatically affected by obesity. However, declines in nodal and paranodal axonal complexes observed in HFD mice indicate that axonal conduction could be impaired. Single nucleotide polymorphisms in the neuronal cell adhesion gene, *Negr1*, are associated with obesity (Willer et al., 2009) and reduce FA in white matter tracts (Dennis et al., 2014) suggesting that there may also be neuronal factors driving reduced axoglial signaling and myelination in obese white matter.

### **Potential mechanisms of obesity-induced OPC differentiation block**

Our results in adult onset diet-induced obesity are similar to those seen in genetically obese (*ob/ob*) mice with reductions in myelin (Sena et al., 1985) and increases in OPCs in leptin-deficient *ob/ob* mice (Udagawa et al., 2006). OPCs lack the leptin receptor after E18 and are not sensitive to leptin (Udagawa et al., 2006). Though increased in the peripheral circulation in HFD mice (Van Heek et al., 1997) and obese humans (Segal et al., 1996), leptin does not readily cross into the brain during obesity (Caro et al., 1996; Schwartz et al., 1996). Therefore, the effect of obesity on OPC number and differentiation is not due to leptin but more likely resulting from changes in metabolite availability or leptin-independent oligodendrocyte maturation pathways. Gene ontology results suggest that Rho family GTPase signaling is directly affected by obesity with *Fyn* and downstream *Cdc42ep* signaling a likely focal point for obesity-induced differentiation block (Liang et al., 2004). Here, we used a marker gene expression profiling approach for OPC staging that while able to clearly identify the stage of obesity-induced differentiation block fails to identify network signaling pathways that could be targeted to promote OPC differentiation during obesity. The increased numbers of PDGFR $\alpha$ -HA<sup>+</sup> cells within callosal white matter during the development of adult onset obesity indicates that PDGFR $\alpha$ <sup>+</sup> OPCs can efficiently exit to the PMO stage but cannot fully differentiate into myelinating oligodendrocytes. *MyRF* and *Fyn* kinase are key regulators of this transition (Umemori et al., 1994; Bujalka et al., 2013; Duncan et al., 2017) but the effect of obesity on

these key regulatory checkpoints is not known. The lack of reliable markers for this PMO stage restricts the ability to enumerate these PMO cells. White matter primed with differentiation-restricted OPCs resulting from obesity is likely to impair signal transduction in white matter tracts vital for cognitive processing and can partially explain human imaging findings associated with obesity.

### **Expansion of the white matter stroke penumbra in obesity**

White matter ischemic lesions are associated with cognitive impairment and functional decline and increased by obesity (Alfaro et al., 2018). White matter ischemic lesions are characterized by a robust early loss of axons, myelin and oligodendrocytes (Valeriani et al., 2000; Back et al., 2007; Sozmen et al., 2009). Similar to inflammatory white matter lesions (Tripathi et al., 2010), OPCs respond early and robustly to white matter ischemic lesions (Sozmen et al., 2009; Miyamoto et al., 2015; Sozmen et al., 2016) though stroke-responsive OPCs largely adopt an astrocytic phenotype but can be stimulated to remyelinate by blocking Nogo receptor signaling (Sozmen et al., 2016). The peri-infarct white matter at the margin of the ischemic lesion, often referred to as the white matter penumbral region (Maillard et al., 2011), is where tissue repair is active. Axoglial signaling between axons and oligodendrocytes is compromised by brain ischemia (Reimer et al., 2011) and even more perilous in this white matter penumbral tissue (Hinman et al., 2015; Rosenzweig and Carmichael, 2015). Here, we used a novel approach to identify the spatial relationship of stroke-responsive OPCs to an elliptical lesion. This novel approach directly informs our data by showing that the increase in stroke-responsive OPCs produced by obesity occurs precisely in the peripheral margins of the white matter stroke lesion where tissue repair and axoglial signaling is maximal. Indeed, one month after stroke, obesity leaves behind a population of activated, injury-responsive OPCs whose differentiation is inhibited. This progenitor restricted state induced by obesity could indicate that remyelination is simply delayed or it could lead to a progressive dysfunctional OPC response as the ability of NG2+ OPCs to differentiate into oligodendrocytes declines with chronic insults (Mason et al., 2004).

In conclusion, this study defines an obesity-induced differentiation-restricted OPC state that alters the local response to and repair after focal white matter ischemia. Beyond ischemia,

these findings have important bearing on the implementation of remyelination therapies. The efficacy of cellular and molecular remyelinating therapies deserves further study in the context of obesity if the translational potential of these treatment approaches is to be fully realized.



**Table 1.** Gene ontologies for differentially expressed genes in HFD white matter

| <i>Down-regulated genes</i>                                               |                |                                          |
|---------------------------------------------------------------------------|----------------|------------------------------------------|
| <b>Process</b>                                                            | <b>p-value</b> | <b>Genes</b>                             |
| GO:1990295 – post-anaphase microtubule array                              | 0.0060         | <i>Ndrp1, Cdc42ep2</i>                   |
| GO:0009574 – preprophase band                                             | 0.0060         | <i>Ndrp1, Cdc42ep2</i>                   |
| GO:0030981 – cortical microtubule cytoskeleton                            | 0.0071         | <i>Ndrp1, Cdc42ep2</i>                   |
| GO:0007417 – CNS development                                              | 0.0002         | <i>Mbp, Mal, Mog, Gjb1</i>               |
| GO:0021510 – spinal cord development                                      | 0.0001         | <i>Mbp, Mal, Mog</i>                     |
| GO:0048709 – oligodendrocyte development                                  | 0.0001         | <i>Mbp, Mal, Mog</i>                     |
| GO:0008656 – cysteine-type endopeptidase activator activity               | 0.0161         | <i>Mal</i>                               |
| GO:0004065 – arylsulfatase activity                                       | 0.0134         | <i>Arsg</i>                              |
| GO:0017049 - GTP-Rho binding                                              | 0.0240         | <i>Cdc42ep2</i>                          |
| <i>Up-regulated genes</i>                                                 |                |                                          |
| <b>Process</b>                                                            | <b>p-value</b> | <b>Genes</b>                             |
| GO:1990270 – PDGFR-ligand complex                                         | 0.0082         | <i>Cspg4, Atrn, Gp1bb, Pcdh15, Sstr1</i> |
| GO:0120001 – apical plasma membrane urothelial plaque                     | 0.0082         | <i>Cspg4, Atrn, Gp1bb, Pcdh15, Sstr1</i> |
| GO:0000223 – plasma membrane proton-transporting V-type ATPase, V1 domain | 0.0082         | <i>Cspg4, Atrn, Gp1bb, Pcdh15, Sstr1</i> |
| GO:0000270 – peptidoglycan metabolic process                              | 0.0004         | <i>Cspg4, Dcn</i>                        |
| GO:1903510 – mucopolysaccharide metabolic process                         | 0.0004         | <i>Cspg4, Dcn</i>                        |
| GO:0030203 – glycosaminoglycan metabolic process                          | 0.0004         | <i>Cspg4, Dcn</i>                        |
| GO:0043731 – 6-hydroxynicotinate 3-monooxygenase activity                 | 0.0084         | <i>Mical3</i>                            |
| GO:0003779 – actin binding                                                | 0.0076         | <i>Mical3, Ssh3</i>                      |
| GO:0033777 – lithocholate 6beta-hydroxylase activity                      | 0.0084         | <i>Mical3</i>                            |

The top three GO terms in each category of cellular component, biological process, and molecular function (2017b) were selected based on the combined score measure using Enrichr (Chen et al., 2013; Kuleshov et al., 2016). *p*-values determined by Fisher’s exact test.



## Figure Legends

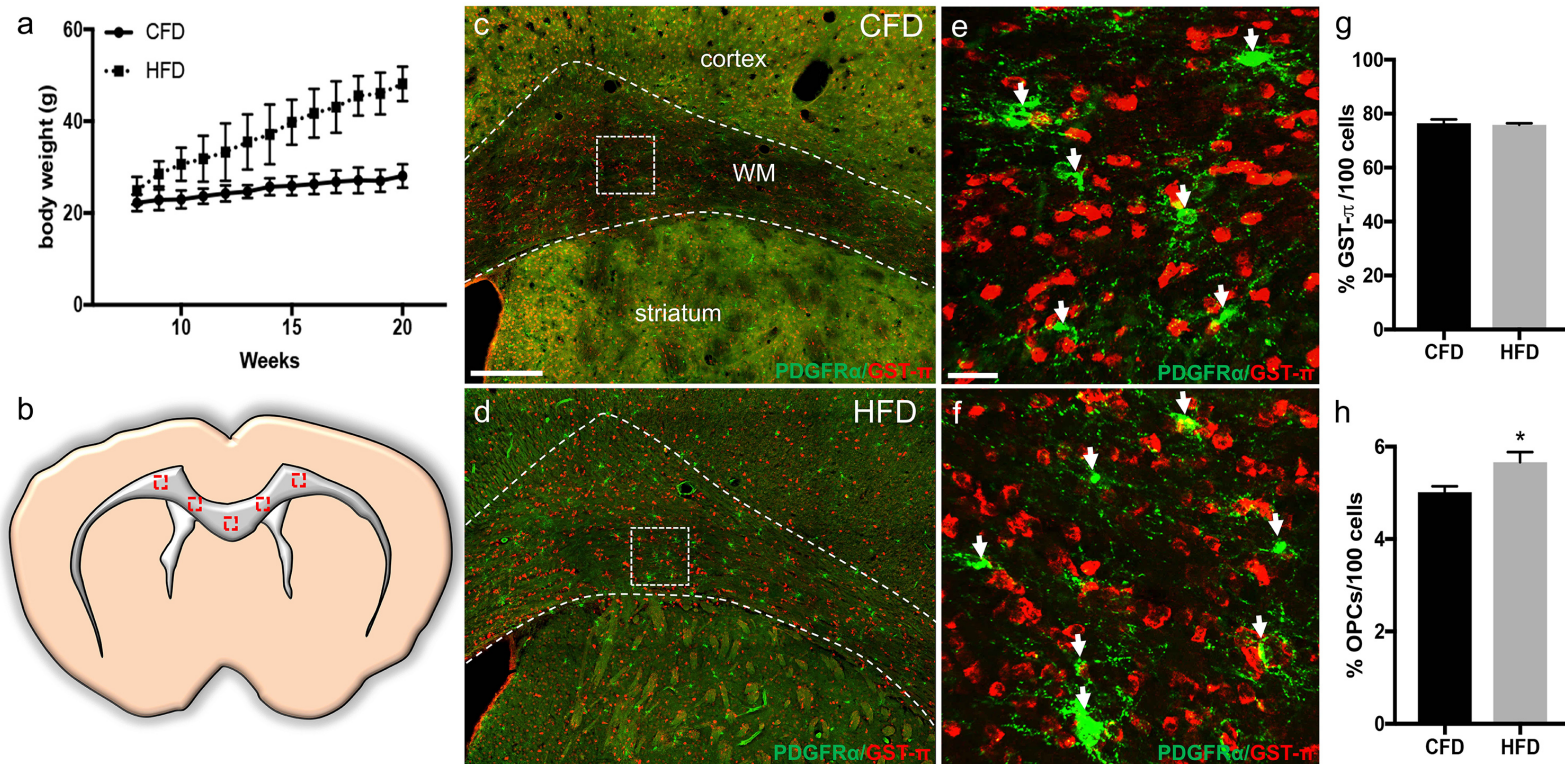

### Figure 1. High fat diet increases oligodendrocyte precursor cells in white matter.

Consumption of a 60% kcal from fat diet (HFD) results in rapid and significant weight gain beginning from week 9 compared to 10% kcal from fat diet (CFD) (a). After 12 weeks on HFD, we sampled corpus callosum and subcortical white matter as indicated (red boxes) (b). Labeling for GST- $\pi$ <sup>+</sup> mature oligodendrocytes (red) and PDGFR- $\alpha$ <sup>+</sup> OPCs (green) in animals on CFD (c, e) and HFD (d, f) reveals an increase in PDGFR- $\alpha$ <sup>+</sup> cells (arrows, e vs. f). Quantitation of GST- $\pi$ <sup>+</sup> cells/100 cells was not changed (g) while the percentage of PDGFR- $\alpha$ <sup>+</sup> cells was significantly increased in animals on HFD (h). Data are mean  $\pm$  SEM. Scale bars = 200  $\mu$ m (c, d) and 20  $\mu$ m (e, f).

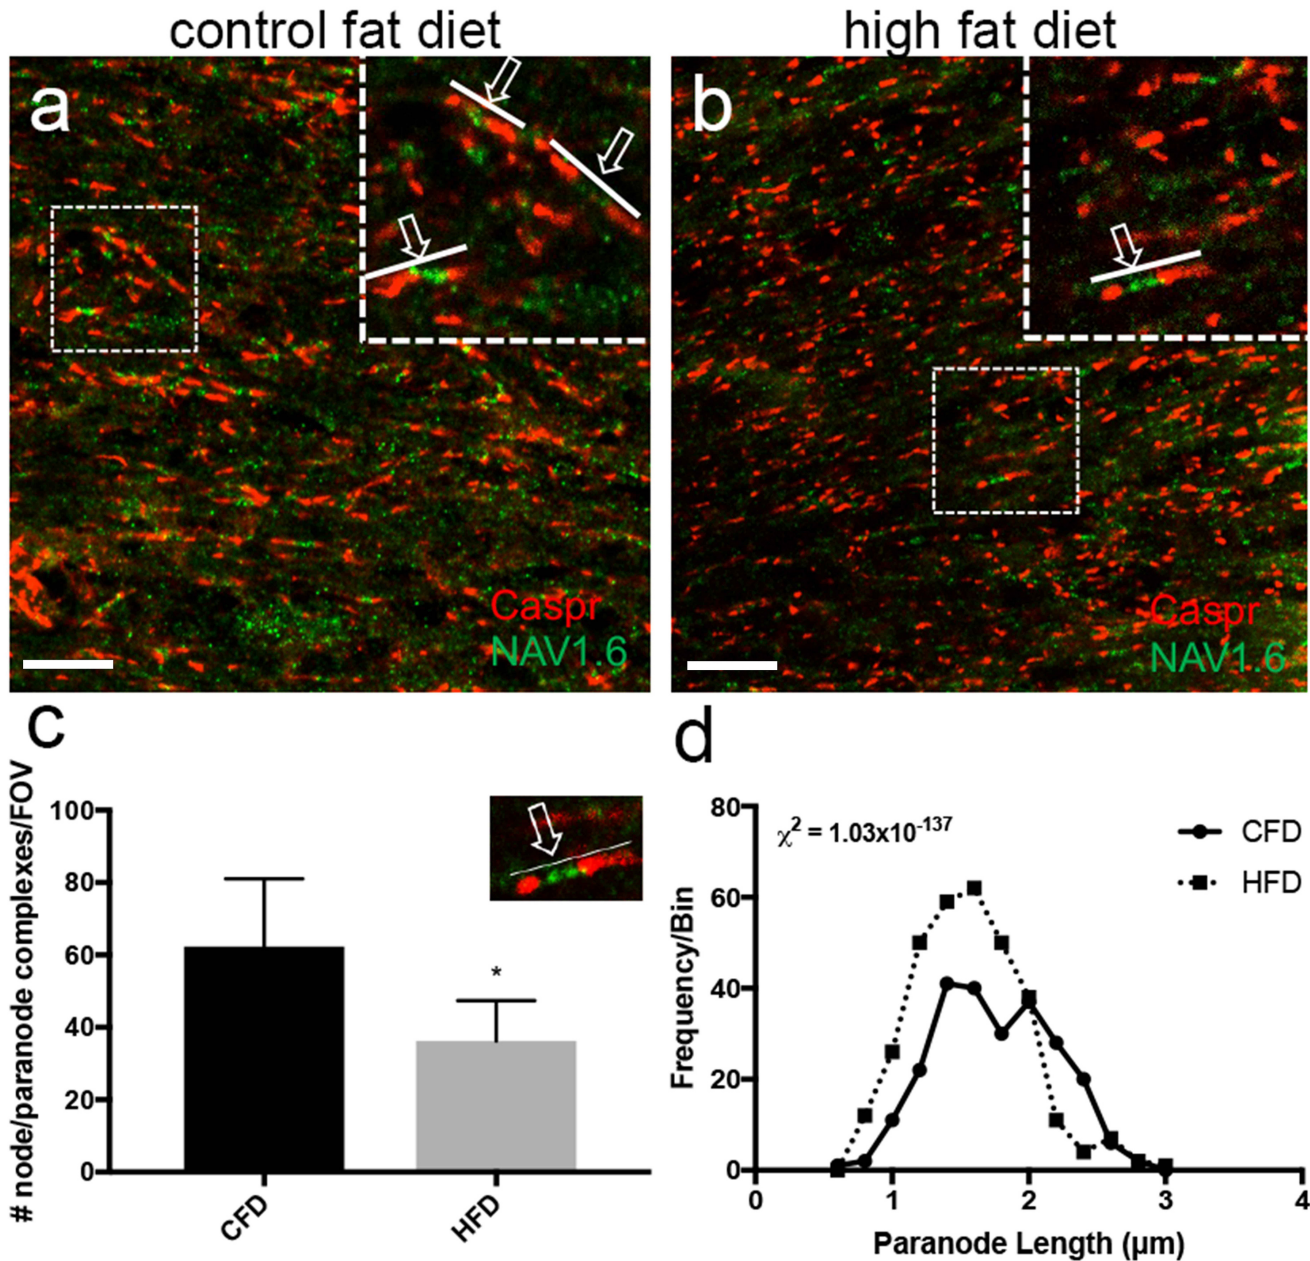

**Figure 2. High fat diet reduces axonal microdomain integrity and paranodal length.**

Labeling for nodal (Nav1.6, green) and paranodal (caspr, red) axonal microdomain segments within white matter in animals on CFD (a) and HFD (b). Inset boxes show examples of intact nodal and paranodal complexes (arrow with line). The number of nodal and paranodal complexes, defined as adjacent caspr+ paranodal segments with concurrent Nav1.6+ nodal segments (example in inset), is reduced in animals on HFD (c). The distribution of paranodal length (binned by 0.2  $\mu\text{m}$ ) demonstrates a significant right shift towards shorter paranodes in animals on HFD (dashed line) compared to CFD (solid line) (d). Scale bar = 10  $\mu\text{m}$ .



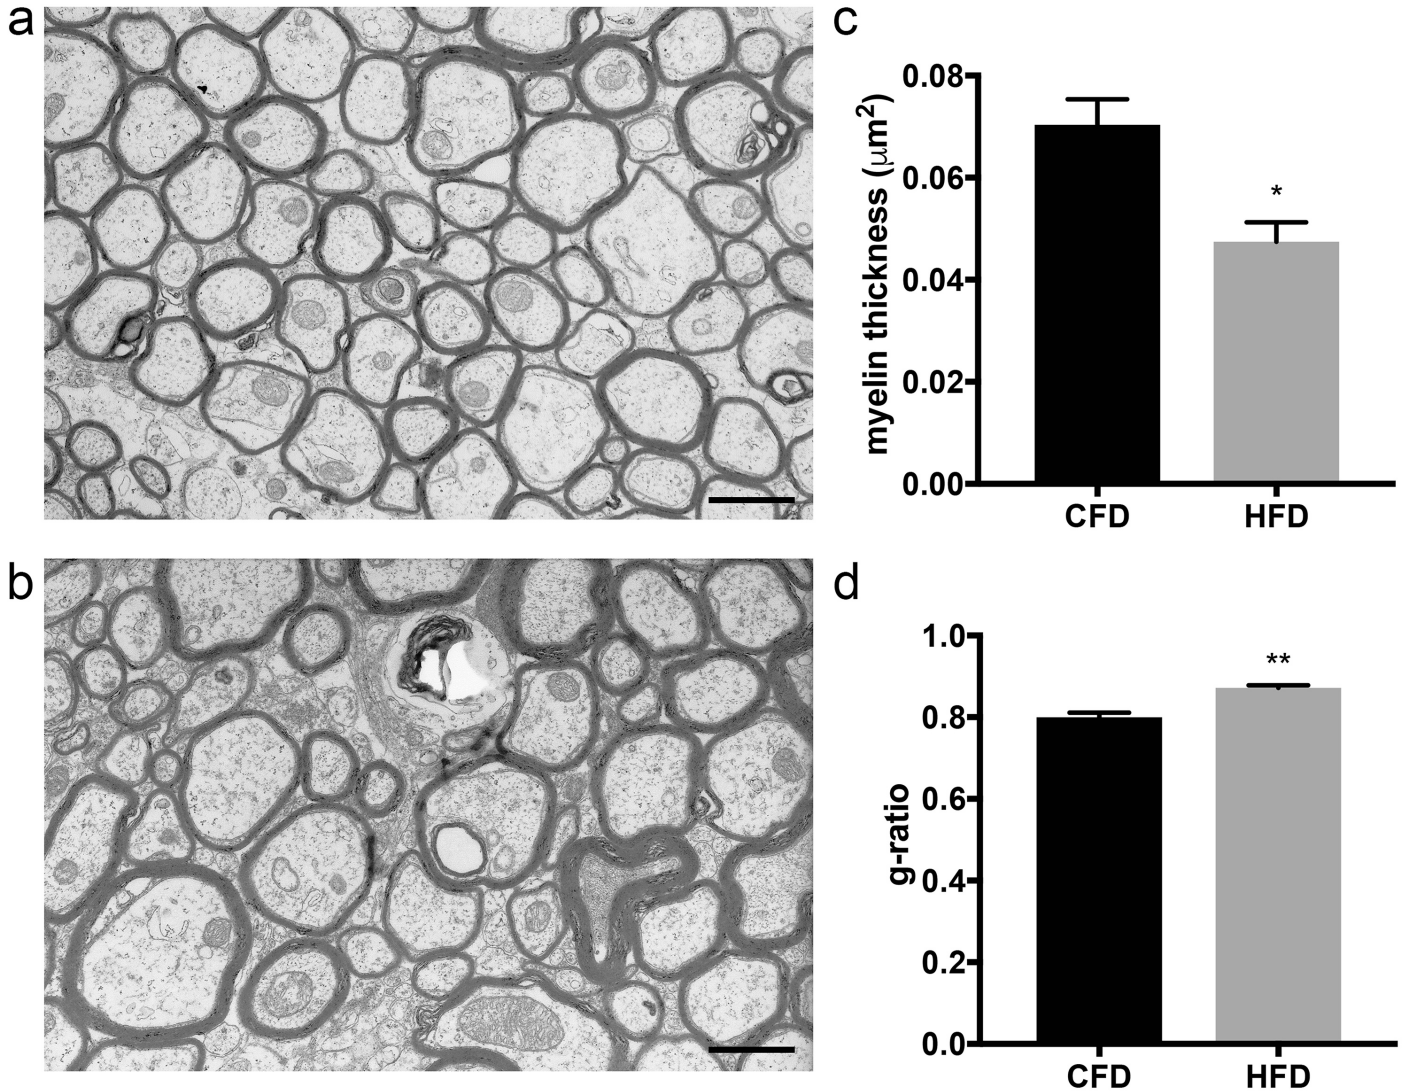

**Figure 3. High fat diet compromises myelin ultrastructure.**

Callosal fibers at the midline were prepared in sagittal section for electron microscopy. Animals on CFD demonstrated regular axonal and fiber diameter with an abundance of normally myelinated fibers (a). After 12 weeks on HFD, myelin ultrastructure in callosal fibers is compromised with reductions in myelin sheath thickness without significant changes in axonal number or fiber diameter (b). Myelin sheath thickness was significantly reduced ( $0.070 \mu\text{m}$  vs.  $0.047 \mu\text{m}$ ;  $p=0.0087$ ) (c). The average g-ratio was increased ( $0.88$  vs.  $0.80$ ;  $p=0.002$ ;  $n=6$ ) in animals on HFD compared to CFD (d). 7200X magnification; scale bar =  $1 \mu\text{m}$ . Data are mean  $\pm$  SEM.

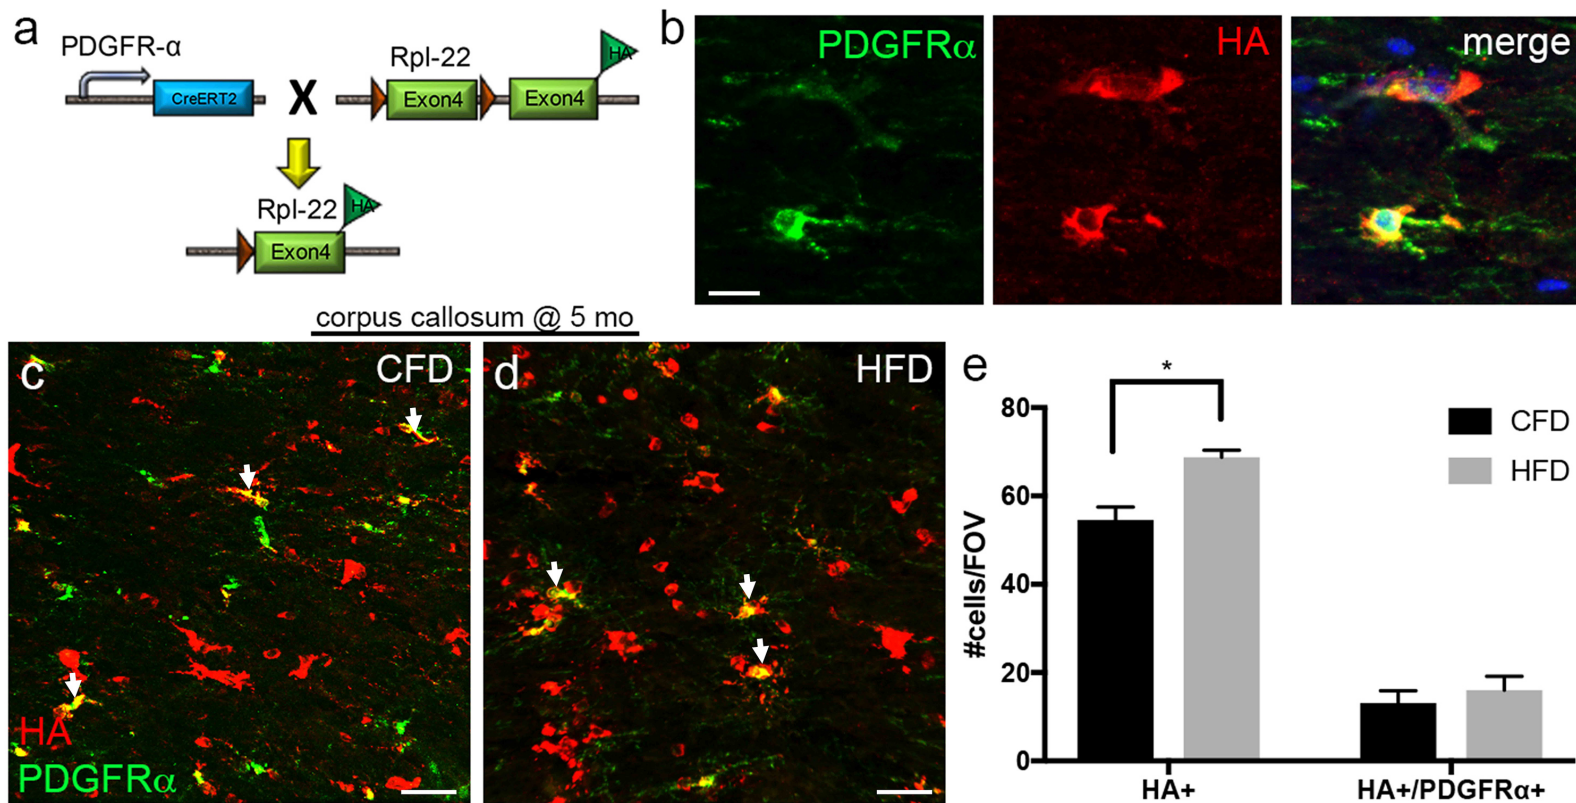

**Figure 4. *PDGFR $\alpha$ -Cre<sup>ERT2</sup>;Rpl22<sup>tm1.1P<sub>Sam</sub></sup>* fate mapping reveals accelerated OPC differentiation in obese mice.** *PDGFR $\alpha$ -Cre<sup>ERT2</sup>;Rpl22<sup>tm1.1P<sub>Sam</sub></sup>* mice result in tamoxifen-dependent Cre expression in OPCs and resultant Rpl22 exon 4 substitution with an HA-tagged exon 4 (a). After tamoxifen induction, there is robust HA labeling within PDGFR $\alpha$ + OPCs that is largely restricted to the peri-nuclear region indicating ribosomal labeling (b). Beginning at 8 weeks of age, Cre+;Rpl22-fl/fl mice ( $n=8$ ) were fed a CFD or HFD for 12 weeks ( $n=4$ /grp). Tamoxifen induction was administered for 4d at the initiation of dietary change. Co-labeling for HA and PDGFR $\alpha$  in the corpus callosum at 20 weeks shows animals on CFD have significant OPC differentiation over 12 weeks with 54.5% of cells/field of view HA+ and 13.1% of cells/fov HA+/PDGFR $\alpha$ + (c). HA+ cells/fov were increased (68.8%) in animals on HFD with a similar number of HA+/PDGFR $\alpha$ + cells/fov (16.1%) (d). Quantitation of HA+ and HA+/PDGFR $\alpha$ + cells/fov (e). Scale bar = 10  $\mu$ m (b) and 20  $\mu$ m (c, d). \* $p=0.011$ . Data are mean  $\pm$  SEM.

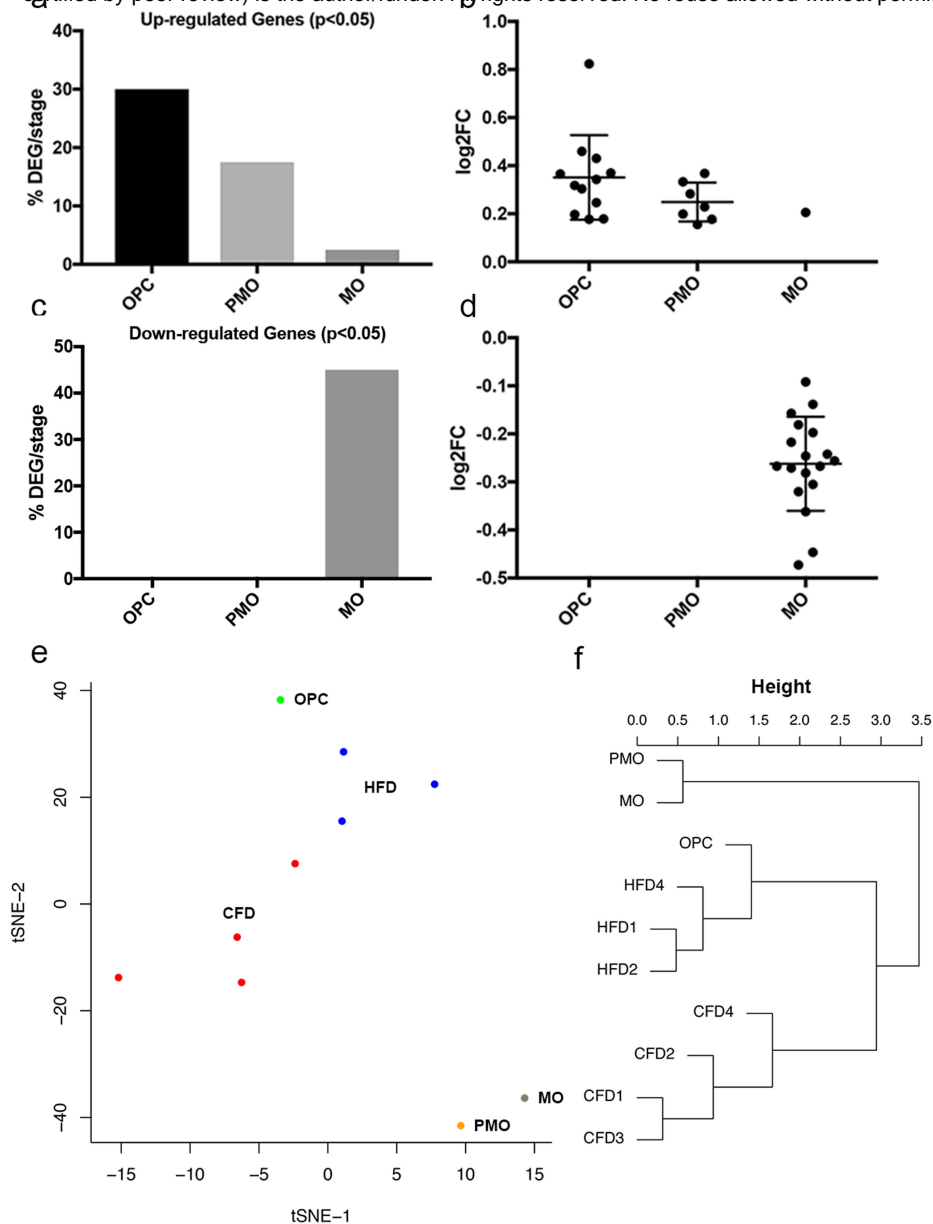

### Figure 5. Oligodendrocyte staging by gene expression reveals obesity-induced differentiation block.

A Nanostring gene expression staging assay using known oligodendrocyte stage markers (40/stage) for OPC, premyelinating (PMO), and myelinating oligodendrocytes (MO) was used as described in Materials & Methods. Total RNA was isolated from callosal white matter from animals on CFD ( $n=4$ ) or HFD ( $n=3$ ) after 12 weeks on diet. Normalized counts of gene expression were compared for differential gene expression ( $p < 0.05$ ). Differentially expressed genes (DEGs) were enumerated by oligodendrocyte stage (%DEG/stage). Genes significantly up-regulated in animals on HFD were preferentially in the OPC ( $p=0.0018$ ) and PMO stages (a). The average log-fold change (logFC) of the individual up-regulated DEGs are plotted by stage (b). Significantly down-regulated genes in animals on HFD were exclusively MO stage genes (c). The average log-fold change (logFC) of the individual down-regulated DEGs are plotted by stage (d). tSNE scatterplot of total gene expression profiles (120 genes) for animals on CFD (red) and HFD (blue) together with known OPC (green), PMO (yellow), and MO (gray) gene expression profiles (e). Hierarchical clustering of samples (f). logFC data are mean  $\pm$  SEM.



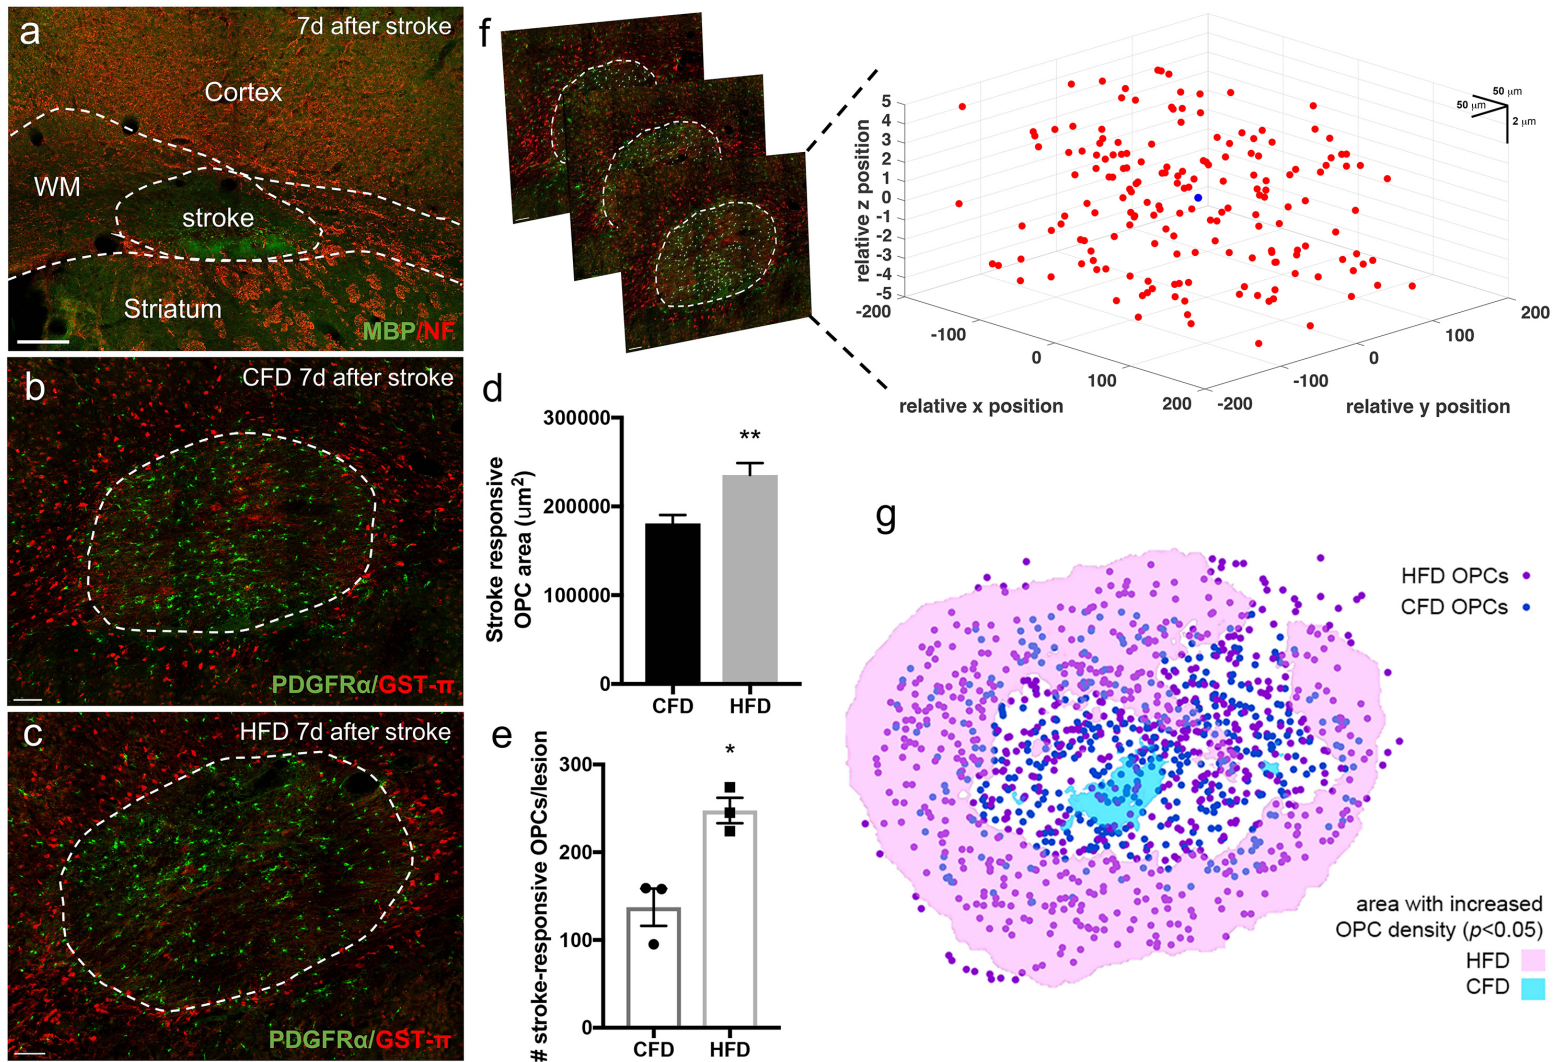

**Figure 6. High fat diet induces an exaggerated OPC response to white matter stroke.**

White matter stroke induction in the left subcortical white matter underlying sensorimotor cortex produces a focal region of reduced myelin basic protein (MBP, green) staining and a loss of neurofilament-200 (NF, red) seven days after stroke (a). Labeling for GST- $\pi$ + mature oligodendrocytes (red) and PDGFR- $\alpha$ + OPCs (green) in animals on CFD ( $n=4$ ) (b) and HFD ( $n=4$ ) (c) were used to identify stroke-responsive PDGFR- $\alpha$ + OPCs (dashed line, b) and the extent of oligodendrocyte loss after stroke. Quantification of the stroke-responsive OPC area ( $\mu\text{m}^2$ , d) and the number of stroke-responsive OPCs per lesion (e). Confocal z-stacks through the white matter stroke lesion were used and spatial coordinates ( $x, y, z$  in  $\mu\text{m}$ ) relative to the center point of the stroke lesion (blue dot) were used to generate a spatial map of stroke-responsive OPCs (red) (f). Two-dimensional nearest neighbor spatial analysis comparing peri-infarct spatial frequency of stroke-responsive OPCs between CFD (blue) and HFD (pink) with the area of significantly ( $p < 0.05$ ) greater frequency of stroke-responsive OPCs between conditions in the shaded area (CFD, blue; HFD, pink) (g). Scale bar = 200  $\mu\text{m}$  (a), 50  $\mu\text{m}$  (d, e). Data are mean  $\pm$  SEM.



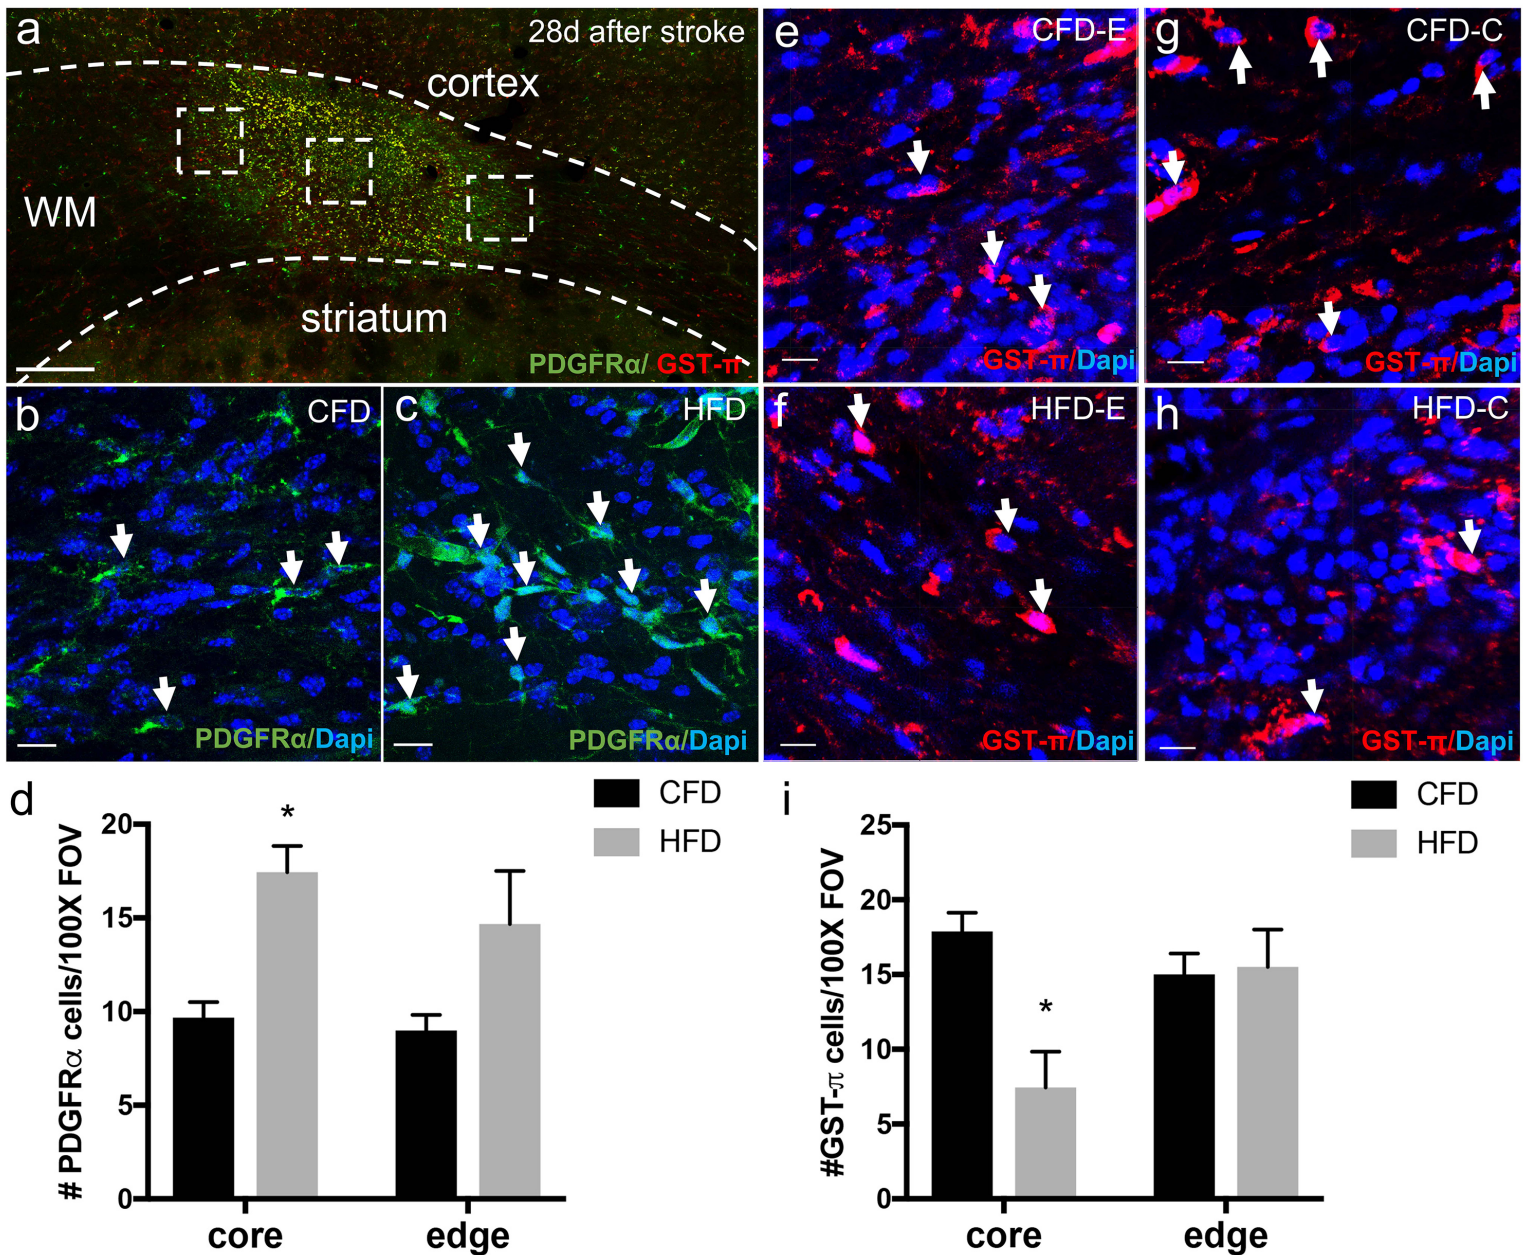

**Figure 7. Obesity restricts the differentiation of stroke-responsive OPCs.**

Twenty-eight days after white matter stroke induction labeling for GST- $\pi$ + mature oligodendrocytes (red) and PDGFR- $\alpha$ + OPCs (green) within the stroke lesion identifies a lesion center and adjacent peri-infarct lesion edges (dashed inset boxes) (a). PDGFR- $\alpha$ + OPCs within lesion center (CFD, b; HFD, c) are more numerous after HFD (d). GST- $\pi$ + mature oligodendrocytes within the peri-infarct edges (CFD, e; HFD, f) and lesion core (CFD, g; HFD, h) are reduced within the lesion center after HFD and equal at peri-infarct edges (i). Scale bar = 200  $\mu$ m (a), 10  $\mu$ m (b-c, e-h). \* $p$ <0.05. Data are mean  $\pm$  SEM.

## References

- Alfaro FJ, Gavrieli A, Saade-Lemus P, Lioutas VA, Upadhyay J, Novak V (2018) White matter microstructure and cognitive decline in metabolic syndrome: a review of diffusion tensor imaging. *Metabolism* 78:52-68.
- Back SA, Craig A, Kayton RJ, Luo NL, Meshul CK, Allcock N, Fern R (2007) Hypoxia-ischemia preferentially triggers glutamate depletion from oligodendroglia and axons in perinatal cerebral white matter. *J Cereb Blood Flow Metab* 27:334-347.
- Benjamin EJ et al. (2018) Heart Disease and Stroke Statistics-2018 Update: A Report From the American Heart Association. *Circulation*.
- Bergles DE, Richardson WD (2015) Oligodendrocyte Development and Plasticity. *Cold Spring Harb Perspect Biol* 8:a020453.
- Bettcher BM, Walsh CM, Watson C, Miller JW, Green R, Patel N, Miller BL, Neuhaus J, Yaffe K, Kramer JH (2013) Body mass and white matter integrity: the influence of vascular and inflammatory markers. *PLoS One* 8:e77741.
- Bokura H, Yamaguchi S, Iijima K, Nagai A, Oguro H (2008) Metabolic syndrome is associated with silent ischemic brain lesions. *Stroke* 39:1607-1609.
- Bujalka H, Koenning M, Jackson S, Perreau VM, Pope B, Hay CM, Mitew S, Hill AF, Lu QR, Wegner M, Srinivasan R, Svaren J, Willingham M, Barres BA, Emery B (2013) MYRF is a membrane-associated transcription factor that autoproteolytically cleaves to directly activate myelin genes. *PLoS Biol* 11:e1001625.
- Burguet J, Andrey P (2014) Statistical Comparison of Spatial Point Patterns in Biological Imaging. *Plos One* 9.
- Burguet J, Maurin Y, Andrey P (2011) A method for modeling and visualizing the three-dimensional organization of neuron populations from replicated data: Properties, implementation and illustration. *Pattern Recogn Lett* 32:1894-1901.
- Caro JF, Kolaczynski JW, Nyce MR, Ohannesian JP, Opentanova I, Goldman WH, Lynn RB, Zhang PL, Sinha MK, Considine RV (1996) Decreased cerebrospinal-fluid/serum leptin ratio in obesity: a possible mechanism for leptin resistance. *Lancet* 348:159-161.
- Chang A, Nishiyama A, Peterson J, Prineas J, Trapp BD (2000) NG2-positive oligodendrocyte progenitor cells in adult human brain and multiple sclerosis lesions. *J Neurosci* 20:6404-6412.
- Chen EY, Tan CM, Kou Y, Duan Q, Wang Z, Meirelles GV, Clark NR, Ma'ayan A (2013) Enrichr: interactive and collaborative HTML5 gene list enrichment analysis tool. *BMC Bioinformatics* 14:128.
- Dawson MR, Polito A, Levine JM, Reynolds R (2003) NG2-expressing glial progenitor cells: an abundant and widespread population of cycling cells in the adult rat CNS. *Mol Cell Neurosci* 24:476-488.
- Debette S, Seshadri S, Beiser A, Au R, Himali JJ, Palumbo C, Wolf PA, DeCarli C (2011) Midlife vascular risk factor exposure accelerates structural brain aging and cognitive decline. *Neurology* 77:461-468.
- Dennis EL, Jahanshad N, Braskie MN, Warstadt NM, Hibar DP, Kohannim O, Nir TM, McMahon KL, de Zubicaray GI, Montgomery GW, Martin NG, Toga AW, Wright MJ, Thompson PM (2014) Obesity gene NEGR1 associated with white matter integrity in healthy young adults. *Neuroimage* 102 Pt 2:548-557.



- Duncan GJ, Plemel JR, Assinck P, Manesh SB, Muir FGW, Hirata R, Berson M, Liu J, Wegner M, Emery B, Moore GRW, Tetzlaff W (2017) Myelin regulatory factor drives remyelination in multiple sclerosis. *Acta Neuropathol* 134:403-422.
- Gouw AA, van der Flier WM, Fazekas F, van Straaten EC, Pantoni L, Poggesi A, Inzitari D, Erkinjuntti T, Wahlund LO, Waldemar G, Schmidt R, Scheltens P, Barkhof F (2008) Progression of white matter hyperintensities and incidence of new lacunes over a 3-year period: the Leukoaraiosis and Disability study. *Stroke* 39:1414-1420.
- Hinman JD, Carmichael ST (2014) Acute axonal injury in white matter stroke. In: *White Matter Injury in Stroke and CNS Disease* (Baltan S, Carmichael ST, Matute C, Xi G, Zhang J, eds), pp 521-535. New York: Springer.
- Hinman JD, Rasband MN, Carmichael ST (2013) Remodeling of the axon initial segment after focal cortical and white matter stroke. *Stroke* 44:182-189.
- Hinman JD, Lee MD, Tung S, Vinters HV, Carmichael ST (2015) Molecular disorganization of axons adjacent to human lacunar infarcts. *Brain* 138:736-745.
- Inzitari D, Pracucci G, Poggesi A, Carlucci G, Barkhof F, Chabriat H, Erkinjuntti T, Fazekas F, Ferro JM, Hennerici M, Langhorne P, O'Brien J, Scheltens P, Visser MC, Wahlund LO, Waldemar G, Wallin A, Pantoni L, Group LS (2009) Changes in white matter as determinant of global functional decline in older independent outpatients: three year follow-up of LADIS (leukoaraiosis and disability) study cohort. *BMJ* 339:b2477.
- Karlsson HK, Tuulari JJ, Hirvonen J, Lepomaki V, Parkkola R, Hiltunen J, Hannukainen JC, Soinio M, Pham T, Salminen P, Nuutila P, Nummenmaa L (2013) Obesity is associated with white matter atrophy: a combined diffusion tensor imaging and voxel-based morphometric study. *Obesity (Silver Spring)* 21:2530-2537.
- Kuleshov MV, Jones MR, Rouillard AD, Fernandez NF, Duan Q, Wang Z, Koplev S, Jenkins SL, Jagodnik KM, Lachmann A, McDermott MG, Monteiro CD, Gundersen GW, Ma'ayan A (2016) Enrichr: a comprehensive gene set enrichment analysis web server 2016 update. *Nucleic Acids Res* 44:W90-97.
- Kullmann S, Callaghan MF, Heni M, Weiskopf N, Scheffler K, Haring HU, Fritsche A, Veit R, Preissl H (2016) Specific white matter tissue microstructure changes associated with obesity. *Neuroimage* 125:36-44.
- Liang X, Draghi NA, Resh MD (2004) Signaling from integrins to Fyn to Rho family GTPases regulates morphologic differentiation of oligodendrocytes. *J Neurosci* 24:7140-7149.
- Maillard P, Fletcher E, Harvey D, Carmichael O, Reed B, Mungas D, DeCarli C (2011) White matter hyperintensity penumbra. *Stroke* 42:1917-1922.
- Mason JL, Toews A, Hostettler JD, Morell P, Suzuki K, Goldman JE, Matsushima GK (2004) Oligodendrocytes and progenitors become progressively depleted within chronically demyelinated lesions. *Am J Pathol* 164:1673-1682.
- McDonald JW, Levine JM, Qu Y (1998a) Multiple classes of the oligodendrocyte lineage are highly vulnerable to excitotoxicity. *Neuroreport* 9:2757-2762.
- McDonald JW, Althomsons SP, Hyrc KL, Choi DW, Goldberg MP (1998b) Oligodendrocytes from forebrain are highly vulnerable to AMPA/kainate receptor-mediated excitotoxicity. *Nat Med* 4:291-297.
- Miyamoto N, Maki T, Shindo A, Liang AC, Maeda M, Egawa N, Itoh K, Lo EK, Lok J, Ihara M, Arai K (2015) Astrocytes Promote Oligodendrogenesis after White Matter Damage via Brain-Derived Neurotrophic Factor. *J Neurosci* 35:14002-14008.

- Mohammadi S, Carey D, Dick F, Diedrichsen J, Sereno MI, Reisert M, Callaghan MF, Weiskopf N (2015) Whole-Brain In-vivo Measurements of the Axonal G-Ratio in a Group of 37 Healthy Volunteers. *Front Neurosci* 9:441.
- Nunez S, Doroudchi MM, Gleichman AJ, Ng KL, Llorente IL, Sozmen EG, Carmichael ST, Hinman JD (2016) A Versatile Murine Model of Subcortical White Matter Stroke for the Study of Axonal Degeneration and White Matter Neurobiology. *J Vis Exp*.
- Ogden CL, Carroll MD, Fryar CD, Flegal KM (2015) Prevalence of obesity among adults and youth: United States, 2011-2014. NCHS data brief, no 219. In. Hyattsville, MD: National Center for Health Statistics.
- Oka A, Belliveau MJ, Rosenberg PA, Volpe JJ (1993) Vulnerability of oligodendroglia to glutamate: pharmacology, mechanisms, and prevention. *J Neurosci* 13:1441-1453.
- Pantoni L, Garcia JH, Gutierrez JA (1996) Cerebral white matter is highly vulnerable to ischemia. *Stroke* 27:1641-1646; discussion 1647.
- Park K, Yasuda N, Toyonaga S, Tsubosaki E, Nakabayashi H, Shimizu K (2008) Significant associations of metabolic syndrome and its components with silent lacunar infarction in middle aged subjects. *J Neurol Neurosurg Psychiatry* 79:719-721.
- Podrini C, Cambridge EL, Lelliott CJ, Carragher DM, Estabel J, Gerdin AK, Karp NA, Scudamore CL, Sanger Mouse Genetics P, Ramirez-Solis R, White JK (2013) High-fat feeding rapidly induces obesity and lipid derangements in C57BL/6N mice. *Mamm Genome* 24:240-251.
- Pringle NP, Richardson WD (1993) A singularity of PDGF alpha-receptor expression in the dorsoventral axis of the neural tube may define the origin of the oligodendrocyte lineage. *Development* 117:525-533.
- Reimer MM, McQueen J, Searcy L, Scullion G, Zonta B, Desmazieres A, Holland PR, Smith J, Gliddon C, Wood ER, Herzyk P, Brophy PJ, McCulloch J, Horsburgh K (2011) Rapid disruption of axon-glia integrity in response to mild cerebral hypoperfusion. *J Neurosci* 31:18185-18194.
- Rosenzweig S, Carmichael ST (2013) Age-dependent exacerbation of white matter stroke outcomes: a role for oxidative damage and inflammatory mediators. *Stroke* 44:2579-2586.
- Rosenzweig S, Carmichael ST (2015) The axon-glia unit in white matter stroke: mechanisms of damage and recovery. *Brain Res* 1623:123-134.
- Schindelin J, Arganda-Carreras I, Frise E, Kaynig V, Longair M, Pietzsch T, Preibisch S, Rueden C, Saalfeld S, Schmid B, Tinevez JY, White DJ, Hartenstein V, Eliceiri K, Tomancak P, Cardona A (2012) Fiji: an open-source platform for biological-image analysis. *Nat Methods* 9:676-682.
- Schwartz MW, Peskind E, Raskind M, Boyko EJ, Porte D, Jr. (1996) Cerebrospinal fluid leptin levels: relationship to plasma levels and to adiposity in humans. *Nat Med* 2:589-593.
- Segal KR, Landt M, Klein S (1996) Relationship between insulin sensitivity and plasma leptin concentration in lean and obese men. *Diabetes* 45:988-991.
- Sena A, Sarlieve LL, Rebel G (1985) Brain myelin of genetically obese mice. *J Neurol Sci* 68:233-243.
- Sozmen EG, Kolekar A, Havton LA, Carmichael ST (2009) A white matter stroke model in the mouse: axonal damage, progenitor responses and MRI correlates. *J Neurosci Methods* 180:261-272.

- Sozmen EG, Rosenzweig S, Llorente IL, DiTullio DJ, Machnicki M, Vinters HV, Havton LA, Giger RJ, Hinman JD, Carmichael ST (2016) Nogo receptor blockade overcomes remyelination failure after white matter stroke and stimulates functional recovery in aged mice. *Proc Natl Acad Sci U S A* 113:E8453-E8462.
- Stanek KM, Grieve SM, Brickman AM, Korgaonkar MS, Paul RH, Cohen RA, Gunstad JJ (2011) Obesity is associated with reduced white matter integrity in otherwise healthy adults. *Obesity (Silver Spring)* 19:500-504.
- Surwit RS, Kuhn CM, Cochrane C, McCubbin JA, Feinglos MN (1988) Diet-induced type II diabetes in C57BL/6J mice. *Diabetes* 37:1163-1167.
- Tripathi RB, Rivers LE, Young KM, Jamen F, Richardson WD (2010) NG2 glia generate new oligodendrocytes but few astrocytes in a murine experimental autoimmune encephalomyelitis model of demyelinating disease. *J Neurosci* 30:16383-16390.
- Udagawa J, Nimura M, Otani H (2006) Leptin affects oligodendroglial development in the mouse embryonic cerebral cortex. *Neuro Endocrinol Lett* 27:177-182.
- Umemori H, Sato S, Yagi T, Aizawa S, Yamamoto T (1994) Initial events of myelination involve Fyn tyrosine kinase signalling. *Nature* 367:572-576.
- Valeriani V, Dewar D, McCulloch J (2000) Quantitative assessment of ischemic pathology in axons, oligodendrocytes, and neurons: attenuation of damage after transient ischemia. *J Cereb Blood Flow Metab* 20:765-771.
- Van Heek M, Compton DS, France CF, Tedesco RP, Fawzi AB, Graziano MP, Sybertz EJ, Strader CD, Davis HR, Jr. (1997) Diet-induced obese mice develop peripheral, but not central, resistance to leptin. *J Clin Invest* 99:385-390.
- Willer CJ et al. (2009) Six new loci associated with body mass index highlight a neuronal influence on body weight regulation. *Nat Genet* 41:25-34.
- Xu J, Li Y, Lin H, Sinha R, Potenza MN (2013) Body mass index correlates negatively with white matter integrity in the fornix and corpus callosum: a diffusion tensor imaging study. *Hum Brain Mapp* 34:1044-1052.
- Zhang Y, Chen K, Sloan SA, Bennett ML, Scholze AR, O'Keefe S, Phatnani HP, Guarnieri P, Caneda C, Ruderisch N, Deng S, Liddelow SA, Zhang C, Daneman R, Maniatis T, Barres BA, Wu JQ (2014) An RNA-sequencing transcriptome and splicing database of glia, neurons, and vascular cells of the cerebral cortex. *J Neurosci* 34:11929-11947.
